# Supplementary material for: Exploring the Link Between Unmet Needs and Quality of Life in Lymphoma Survivors: A Cross-Sectional Study
Source: Research Square preprint supplement (doi:10.21203/rs.3.rs-6530354/v1), 2025-06-05
Supplement: Supplementary file 1 [file a74e6d30bf4cb0c6445e670a.docx]

Supplementary Materials

**Supplementary File 1** Content Validity Evaluation Procedure for Expert Panel, Adapted (Polit & Beck, 2006; Polit et al., 2007)

| The experts were asked to score each item's clarity, relevance, and representativeness, as outlined below using the rating scale provided. |
| --- |
| Please rate the level of clarity for each item on a scale of 1-4, with 4 being the clearest.  1 = item is not clear  2 = item needs major revisions to be clear  3 = item needs minor revisions to be clear  4 = item is clear |
| Please rate the relevance of each item in measuring the overarching section on a scale of 1-4,  with 4 being the most essential.  1 = item is not necessary  2 = item provides some information but is not essential  3 = item is not useful but is essential  4 = item is essential |
| Please rate the level of representativeness of the item in measuring the overarching section  on a scale of 1-4, 4 being the most representative.  1 = item is not representative  2 = item needs major revisions to be representative  3 = item needs minor revisions to be representative  4 = item is representative |
| In addition, an optional comment box was provided for each section of the questionnaire to capture suggestions from experts, such as adding or deleting items. |

| Basic scoring | | |
| --- | --- | --- |
| Rating of 3 or 4 on a scale = 1  Rating of 1 or 2 on a scale = 0 | | |
| Experts in Agreement | **Universal Agreement (UA)** | **Item-level Content Validity Index (I-CVI)** |
| sum up the relevant rating provided by all the experts for each item  (1 + 1 + 0 + 1 + 1 + 1 + 1 + 1) = 7 | Assign score '1' to the item that achieved 100% expert agreement  Assign score '0' if the item did not achieve 100% agreement | The experts in agreement are divided by the number of experts.  7 of 8 experts in agreement (7/8 = 0.875) |
| *P*c (probability of chance occurrence) is computed using the formula: | | |
| *Pc = [N!/A!(N–A)!]*  *Where N = number of experts and A = number agreeing on good* | | |
| (kappa designating agreement on relevance, clarity or representativeness):  (I-CVI – pc)/(1 – pc)   | The relationship between I-CVI and | | --- | | •••• Excellent Validity = I-CVI ≥ 0.78 and > .74 | | ••• Good Validity = I-CVI < 0.78 and ≥ 0.60 and ≤ .74 | | •• Fair validity = I-CVI < 0.60 and ≥ 0.40 and ≤ .59 | | • Poor validity = I-CVI < 0.40 and < .40 | | | |

**Supplementary File 2** Sociodemographic Characteristics of the Sample by Lymphoma Subtype

|  | **HL** | **NHL** | **Total** | **Test Statistic** | ***p*-value** |
| --- | --- | --- | --- | --- | --- |
| *n*=51 | *n*=144 | *N*=195 |
| **Age, mean (*SD*)** | | | |  |  |
|  | 41.7 (18.8) | 57.5 (15.6) | 53.7 (17.9) | *t*(193)=5.798 | **<.001c,*** |
| **Age categories %** | | | |  |  |
| 18-39 | 56.0 | 15.8 | 26.5 | χ2(2)=30.51 | **<.001a,*** |
| 40-69 | 30.0 | 58.3 | 50.8 |
| 70 or older | 14.0 | 25.9 | 22.8 |
| **Gender %** | | | |  |  |
| Female | 51.0 | 50.0 | 50.3 | χ2(1)=0.01 | .904a |
| Male | 49.0 | 50.0 | 49.7 |
| **Residence %** | | | |  |  |
| Rural | 25.5 | 36.1 | 33.3 | χ2(1)=1.91 | .167a |
| Urban | 74.5 | 63.9 | 66.7 |
| **Living status %** | | | |  |  |
| Living with others | 84.3 | 77.8 | 79.5 | χ2(1)=0.99 | .321a |
| Living alone | 15.7 | 22.2 | 20.5 |
| **Ethnicity %** | | | |  |  |
| Irish | 80.4 | 92.4 | 89.2 | χ2(1)=5.62 | **.018a,*** |
| Other | 19.6 | 7.6 | 10.8 |
| **Employment status %** | | | |  |  |
| Full-time/Part-time | 60.8 | 52.8 | 54.9 | χ2(3)=19.16 | **<.001a,*** |
| Retired/Homemaker | 17.6 | 42.4 | 35.9 |
| Student | 13.7 | 2.1 | 5.1 |
| Unemployed | 7.8 | 2.8 | 4.1 |
| **Employment hours %** | | | |  |  |
| Working less hours than before | 26.7 | 35.5 | 33.0 | χ2(3)=19.16 | .240a |
| Working usual hours | 63.3 | 53.9 | 56.6 |
| Working more hours than before | 10.0 | 3.9 | 5.7 |
| Not working | 0.0 | 6.6 | 4.7 |
| **Time since diagnosis %** | | | |  |  |
| 1 to 3 years | 51.0 | 60.4 | 57.9 | χ2(1)=1.38 | .241a |
| 3 to 5 years | 49.0 | 39.6 | 42.1 |
| **Sites %** | | | |  |  |
| Cancer centre | 65.2 | 57.4 | 59.4 | χ2(1)=0.87 | .352a |
| Regional | 34.8 | 42.6 | 40.6 |
| **Medical card %** | | | | |  |
|  | 51.0 | 43.4 | 45.4 | χ2(1)=0.88 | .348a |
| **Private health insurance %** | | | | |  |
|  | 49.0 | 58.7 | 56.2 | χ2(1)=1.44 | .230a |

Key:****p*=<.05**; HL = Hodgkin lymphoma; NHL = non-Hodgkin lymphoma; a Pearson Chi-Square; b Fisher’s Exact test; c t-test.

|  | **HL** | **NHL** | **Total** | **Test Statistic** | ***p*-value** |
| --- | --- | --- | --- | --- | --- |
| *n*=51 | *n*=144 | *N*=195 |
| **Treatment %** | | | | | |
| Chemotherapy | 92.2 | 91.7 | 91.8 | χ2(1)=0.01 | .913a |
| Immunotherapy | 11.8 | 35.4 | 29.2 | χ2(1)=10.19 | **.001a,*** |
| Radiotherapy | 45.1 | 20.1 | 26.7 | χ2(1)=12.00 | **<.001a,*** |
| Surgery | 29.4 | 15.4 | 19.1 | χ2(1)=4.79 | **.029a,*** |
| Other cellular therapy | 2.0 | 0.0 | 0.5 | N/A | .262b |
| Stem Cell Transplant | 5.9 | 3.5 | 4.1 | N/A | .433b |
| **Medical conditions %** | | | | | |
| Arthritis | 11.8 | 18.1 | 16.4 | χ2(1)=1.09 | .297a |
| Respiratory conditions | 5.9 | 4.9 | 5.1 | χ2(1)=0.08 | .723a |
| Diabetes | 0.0 | 4.2 | 3.1 | χ2(1)=2.19 | .139a |
| Epilepsy | 0.0 | 2.1 | 1.5 | N/A | .568b |
| Kidney disease | 2.0 | 3.5 | 3.1 | χ2(1)=0.29 | .591a |
| Liver disease | 0.0 | 2.1 | 1.5 | N/A | .568b |
| Cardiac conditions | 9.8 | 29.9 | 24.6 | χ2(1)=8.17 | **.004a,*** |
| Hearing or visual impairments | 5.9 | 10.4 | 9.2 | χ2(1)=0.94 | .412a |
| Other chronic conditions | 17.6 | 23.6 | 22.1 | χ2(1)=0.17 | .377a |
| Cognitive conditions | 3.9 | 2.8 | 3.1 | χ2(1)=0.16 | .653a |
| None of these conditions | 58.8 | 38.9 | 44.1 | χ2(1)=6.07 | **.014a,*** |

Key:****p*=<.05**; HL = Hodgkin lymphoma; NHL = non-Hodgkin lymphoma; a Pearson Chi-Square; b Fisher’s Exact test; c t-test.

**Supplementary File 3** The Ten Most Frequently Endorsed High/Very High’ Unmet Needs Items (n=202)

| **Top Items (SFSUNS)** | ***N*** | **%** | **Domains** |
| --- | --- | --- | --- |
| Coping with having a bad memory or lack of focus | 43 | 21.4 | COP |
| Dealing with feeling tired | 38 | 19.0 | COP |
| Dealing with people who expect me to be "back to normal" | 36 | 17.9 | COP |
| Dealing with changes in how my body appears | 34 | 16.9 | COP |
| Dealing with feeling stressed | 33 | 16.4 | COP |
| Paying household bills or other payments | 32 | 16.0 | FIN |
| Dealing with people accepting that having cancer has changed me as a person | 32 | 15.8 | COP |
| Knowing how much time I would need away from work | 31 | 15.5 | FIN |
| Finding what type of financial assistance is available and how to obtain it | 30 | 15.0 | FIN |
| Dealing with reduced support from others when treatment has ended | 29 | 14.6 | COP |

Key: COP=Coping, sharing and emotional needs; FIN=Work and financial needs
